# Supplementary material for: Clinical characteristics and therapeutic strategy of frequent accelerated idioventricular rhythm
Source: PubMed Central journal article supplement (PMC8427942; doi:10.1186/s12872-021-02221-0), 2021-09-08
Supplement: 12872_2021_2221_MOESM1_ESM.pdf [file 12872_2021_2221_MOESM1_ESM.pdf]

| QRS   | LVEF   | Burden |
|-------|--------|--------|
| 176.0 | 61.70  | 40.00  |
| 180.0 | 45.90  | 93.70  |
| 203.0 | 19.80  | 100.00 |
| 110.0 | 62.00  | 7.80   |
| 182.0 | 65.80  | 0.30   |
| 162.0 | 51.00  | 68.70  |
| 139.0 | 65.00  | 3.40   |
| 140.0 | 65.20  | 0.10   |
| 184.0 | 33.00  | #NULL! |
| 120.0 | 67.40  | 0.80   |
| 174.0 | 63.00  | 62.80  |
| 130.0 | 60.00  | 9.20   |
| 138.0 | 68.00  | 66.90  |
| 152.0 | #NULL! | 69.00  |
| 167.0 | 69.00  | 25.30  |
| 150.0 | 45.20  | 99.60  |
| 116.0 | 68.00  | 20.90  |
| 130.0 | 59.00  | 9.60   |
| 158.0 | 68.00  | 25.80  |
| 102.0 | 52.80  | 56.40  |
| 146.0 | 47.50  | 76.00  |
| 110.0 | 60.00  | 8.80   |
| 111.0 | 63.20  | 12.50  |
| 180.0 | 65.00  | 23.50  |
| 129.0 | 59.00  | 94.60  |
| 160.0 | 60.00  | 45.30  |
| 152.0 | 61.00  | 71.50  |
